# Supplementary material for: Exploration of the Specific Pathology of HXMM Tablet Against Retinal Injury Based on Drug Attack Model to Network Robustness
Source: Front Pharmacol. 2022 Mar 25;13:826535. doi: 10.3389/fphar.2022.826535 (PMC8990835; doi:10.3389/fphar.2022.826535)
Supplement: Supplementary file 2 [file DataSheet1.xlsx]

## Sheet: Sheet1
Name	Formula	Annot. DeltaMass [ppm]	Calc. MW	RT [min]	Group Area: HE-Y-NEG	Group Area: HE-Y-POS
Baicalein	C15 H10 O5	-1.17	270.053	28.625	31292367060	35223271980
Baicalin	C21 H18 O11	-0.9	446.084	24.092	25396200260	35042695887
Wogonin	C16 H12 O5	-0.71	284.068	32.15	16488475452	32655955916
Gentiopicrin	C16 H20 O9	-1.12	356.11	20.044	14975773983	9.82675e+08
Wogonoside	C22 H20 O11	-0.77	460.1	26.01	14345987949	17033289956
Citric acid	C6 H8 O7	-0.42	192.027	3.524	12415622458	8.97956e+08
3,5-Dicaffeoylquinic acid	C25 H24 O12	-500001	258.063	22.726	7580485810
Paeoniflorin	C23 H28 O11	-0.96	480.163	20.902	6503462924
Specnuezhenide	C31 H42 O17	-0.69	686.242	22.16	5841670262	1949915919
Oroxylin A-7-O-β-D-glucuronide	C22 H20 O11	-0.81	460.1	25.428	5718083731	7652780527
Danshensu	C9 H10 O5	-0.96	198.053	17.259	5384917758
Acacetin	C16 H12 O5	-0.85	284.068	32.632	5079888540	4527043590
Chrysosplenetin B	C19 H18 O8	-0.57	374.1	32.568	4787737187	12419541500
Oroxylin A	C16 H12 O5	-0.63	284.068	32.951	4737550053	15218975072
Apigenin	C15 H10 O5	-1.19	270.053	27.663	4627635872	3506769582
Isoacteoside	C29 H36 O15	-0.84	624.205	21.75	4110807172	411517919
Salvianolic acid A	C26 H22 O10	-0.7	494.121	24.86	4063789424	1.82761e+08
Luteolin	C15 H10 O6	-1	286.048	25.743	3909438436	2339305111
Gallic acid	C7 H6 O5	-0.89	170.021	8.148	3870081301	273010668
Protocatechualdehyde	C7 H6 O3	-1.35	138.031	18.673	3581569487	2.9098e+08
Stachyose	C24 H42 O21	-0.09	666.222	2.437	3561042395
1-Caffeoylquinic acid	C16 H18 O9	-0.64	354.095	19.362	3396787405	5.45533e+08
Sucrose	C12 H22 O11	-0.87	342.116	2.089	3210427555
Geniposidic acid	C16 H22 O10	-0.78	374.121	17.764	3200341647	1.21594e+08
Manninotriose	C18 H32 O16	-0.31	504.169	2.688	3121912506
Diosmetin	C16 H12 O6	-1.03	300.063	28.371	2963920927	4089793919
Isochlorogenic acid C	C25 H24 O12	-1.27	516.126	23.125	2825741668	4.03227e+08
Loganic acid	C16 H24 O10	-0.71	376.137	18.47	2722191559	1.13217e+08
Chrysin	C15 H10 O4	-0.93	254.058	32.341	2591635774	1838249819
Lithospermic acid	C27 H22 O12	-0.96	538.111	21.757	2381195350
Albiflorin	C23 H28 O11	-0.63	480.163	23.251	2302964728	1394503569
Scutellarein	C15 H10 O6	-0.98	286.048	24.492	2174645928	2.77676e+08
Quercitrin	C21 H20 O11	-0.49	448.1	24.688	2031368672	7.48804e+08
Apigenin-7-O-β-D-glucoside		C21 H20 O10	-0.61	23.01	1862052691	1979827206
Narcissoside		C28 H32 O16	-0.48	21.887	1766062962	6.75784e+08
Typhaneoside		C34 H42 O20	-0.67	21.217	1704290242	7.4392e+08
Ecliptasaponin A		C36 H58 O9	-0.57	32.334	1587768565
Verbascoside		C29 H36 O15	-0.76	22.267	1419426871	1.06434e+08
Benzoylpaeoniflorin		C30 H32 O12	-0.11	26.748	1324947725	5.72987e+08
Pyrogallol		C6 H6 O3	-1.42	8.147	1293897807
Jaceosidin		C17 H14 O7	-0.65	30.435	1099815849	8.46666e+08
Raffinose	C18 H32 O16	91249.9	550.174	1.659	9.95473e+08
Eriodictyol		C15 H12 O6	-1.02	25.409	9.66949e+08	3.96066e+08
Quinic acid		C7 H12 O6	-0.74	19.355	9.5233e+08
Baicalin methyl ester		C22 H20 O11	-0.81	26.314	9.45667e+08	1441994255
Caffeic acid		C9 H8 O4	-0.9	20.063	8.48705e+08
Naringenin chalcone		C15 H12 O5	-0.64	27.468	8.48209e+08	3.30352e+08
Astilbin	C21 H22 O11	-0.8	450.116	21.845	775195351	146663556
Paeonolide		C20 H28 O12	-0.29	20.213	7.75129e+08
Linarin	C28 H32 O14	-0.35	592.179	24.85	7.72122e+08	2198220043
Oxypaeoniflorin		C23 H28 O12	-0.06	19.162	6.536e+08
Diosmetin-7-O-β-D-glucopyranoside		C22 H22 O11	-0.85	23.41	6.45999e+08	1552290531
Pectolinarigenin		C17 H14 O6	-1.11	32.514	6.34898e+08	2778990605
Salidroside		C14 H20 O7	-0.97	18.509	595860396	1.87715e+08
Hesperetin		C16 H14 O6	-1.46	28.171	5.91998e+08	2.88385e+08
Cryptochlorogenic acid		C16 H18 O9	-0.69	18.268	5.90462e+08
Aurantio-obtusin β-D-glucoside		C23 H24 O12	-0.3	23.827	5.76114e+08	2.44218e+08
Apigenin 7-O-glucuronide		C21 H18 O11	-1.43	21.463	5.45649e+08
Iristectorigenin B		C17 H14 O7	-0.59	28.929	510373624	749596486
Protocatechuic acid		C7 H6 O4	-1.28	19.966	4.8663e+08
Azelaic acid		C9 H16 O4	-0.97	23.396	4.85938e+08	1.37942e+07
Luteolin 7-glucuronide		C21 H18 O12	-0.73	22.074	4.75155e+08	6.66665e+08
Taxifolin	C15 H12 O7	-0.9	304.058	21.195	4.6695e+08	8.61344e+07
Methyl hexadecanoate		C17 H34 O2	170228	38.17	4.48743e+08
Rutin	C27 H30 O16	-0.7	610.153	21.573	4.33497e+08	1.85782e+08
Orsellinic acid		C8 H8 O4	-0.78	19.746	4.17616e+08
Kaempferol 3-glucorhamnoside		C27 H30 O15	-0.41	21.796	4.16705e+08	1.55406e+08
Diosmin	C28 H32 O15	-0.08	608.174	22.839	4.11525e+08	8.53678e+08
Lysionotin		C18 H16 O7	-0.57	31.72	393918633	9.08593e+08
Wedelolactone		C16 H10 O7	-0.79	26.174	3.92996e+08	1.46005e+08
Hastatoside 5-		C17 H24 O11	113837	18.842	3.83235e+08
Nystose	C24 H42 O21	69054.3	712.227	1.614	3.78074e+08
Scutellarin methyl ester		C22 H20 O12	-96631.6	23.465	3.17465e+08
Quercetin-3-O-β-D-glucose-7-O-β-D-gentiobioside		C33 H40 O22	-0.73	19.075	3.04793e+08	1.70902e+08
p-Hydroxybenzaldehyde		C7 H6 O2	-0.91	20.402	290272233	4.50994e+07
Mannitol	C6 H14 O6	-0.43	182.079	2.32	2.39252e+08
Forsythoside E		C20 H30 O12	-0.29	18.174	2.32438e+08	2.8141e+07
7-Hydroxycoumarin		C9 H6 O3	-1.9	23.38	2.31437e+08
3,4-Dihydroxyphenylethanol		C8 H10 O3	-1.02	17.529	1.74566e+08
Puerarin	C21 H20 O9	-0.39	416.111	22.913	1.47681e+08	1.89868e+08
Purpureaside C		C35 H46 O20	-0.53	20.077	1.46879e+08
Ellagic acid		C14 H6 O8	-1.2	21.916	1.23254e+08
Salvianolic acid C		C26 H20 O10	2.52	25.802	1.12241e+08
Rhoifolin	C27 H30 O14	0.06	578.164	23.601	1.11492e+08	8.1599e+06
Maltopentaose		C30 H52 O26	-0.31	2.609	1.08095e+08
1,3-Dicaffeoylquinic acid		C25 H24 O12	-0.67	20.446	9.47006e+07	2.39958e+07
6''-O-Acetylglycitin		C24 H24 O11	-0.05	29.037	8.34775e+07	1.74564e+08
Vanillin	C8 H8 O3	-0.77	152.047	19.785	7.56352e+07	1.076e+07
Hyperoside		C21 H20 O12	-0.53	21.103	6.93241e+07
Plantamajoside		C29 H36 O16	-0.58	21.223	6.77776e+07
Pinocembrin		C15 H12 O4	-0.67	32.732	6.02993e+07	2.15219e+07
Sibiricose A5		C22 H30 O14	-0.9	20.114	5.7946e+07
4-Methoxysalicylic acid		C8 H8 O4	-0.78	17.624	5.68125e+07
Tectorigenin		C16 H12 O6	-0.93	25.103	4.87252e+07	1.34065e+08
Demethylwedelolactone		C15 H8 O7	-1.36	22.226	4.3719e+07
Irigenin	C18 H16 O8	-0.83	360.084	28.564	4.35499e+07	2.49812e+08
7,8-Dihydroxycoumarin		C9 H6 O4	-1.37	21.745	4.26042e+07
Casticin	C19 H18 O8	-0.8	374.1	31.034	4.13332e+07
Aucubin	C15 H22 O9	0.31	346.127	17.144	4.01857e+07
Kaempferol		C15 H10 O6	-1.17	22.053	3.87347e+07	2.06637e+08
Spiculisporic acid		C17 H28 O6	-0.58	36.232	3.7474e+07
Cichoric acid		C22 H18 O12	-1.11	21.863	3.40109e+07
Shanzhiside		C16 H24 O11	-0.37	17.386	3.14056e+07
Glomeratose A		C24 H34 O15	-1.52	19.113	2.8825e+07
2''-O-β-L-Galactopyranosylorientin		C27 H30 O16	-0.8	18.601	2.70623e+07	1.41119e+08
Calceolarioside B		C23 H26 O11	-1.18	21.762	2.48663e+07	6.9518e+07
p-Coumaric acid		C9 H8 O3	-1.01	19.287	2.19302e+07
Eriocitrin	C27 H32 O15	0.75	596.175	21.401	2.07843e+07	6.48289e+06
5-Acetylsalicylic acid		C9 H8 O4	116.74	19.42	2.01193e+07
Columbianetin acetate		C16 H16 O5	-0.7	21.078	1.75334e+07	1.36462e+07
Gardenoside		C17 H24 O11	-0.63	19.115	1.67958e+07
Asperulosidic acid		C18 H24 O12	-0.97	17.683	1.6273e+07
Pedunculoside		C36 H58 O10	70733.9	28.456	8.83005e+06
Isosakuranetin		C16 H14 O5	-0.85	25.595	8.78919e+06	3.99079e+07
Quercetin 3-O-β-D-Glucuronide		C21 H18 O13	0.28	21.075	8.65961e+06	8.56786e+06
Naringin dihydrochalcone		C27 H34 O14	-0.45	21.598	7.14488e+06
Purpurin	C14 H8 O5	-0.41	256.037	24.794	6.77317e+06	1.54668e+07
4',7-Di-O-methylnaringenin		C17 H16 O5	-2.03	27.956	5.83116e+06
Isosakuranin		C22 H24 O10	-133933	25.204	4.32237e+06
Linderalactone		C15 H16 O3	-0.58	32.709		3.37325e+07
Sweroside		C16 H22 O9	-0.5	18.493		3.33439e+07
Demethoxyyangonin		C14 H12 O3	-0.09	20.994		1.79629e+07
5-Hydroxy-1-tetralone		C10 H10 O2	-0.44	18.896		1.08885e+07
Homoorientin		C21 H20 O11	0.43	20.864		2.63436e+07
Isopimpinellin		C13 H10 O5	-0.23	30.022		1.576e+07
Abscisic acid		C15 H20 O4	-0.13	20.466		1.97094e+07
Glabrolide		C30 H44 O4	0.62	33.349		2.0781e+07
Isosinensetin		C20 H20 O7	0.15	29.268		1.30272e+07
Xanthotoxol		C11 H6 O4	-0.28	22.981		2.2057e+07
Isofraxidin		C11 H10 O5	-1.15	22.507		2.20727e+07
Xanthoxyline		C10 H12 O4	-0.59	18.493		1.06972e+08
Isoeugenol acetate		C12 H14 O3	-0.85	24.053		3.29957e+08
Eupatilin	C18 H16 O7	-0.4	344.089	31.224		3.12585e+08
5-Hydroxymethylfurfural		C6 H6 O3	0.06	2.046		3.07179e+08
Adenine	C5 H5 N5	0.44	135.055	1.642		2.67101e+08
4-Methylumbelliferone		C10 H8 O3	-0.42	17.778		2.43073e+08
5,7,3'-Trihydroxy-6,4',5'-trimethoxyflavone		C18 H16 O8	-0.84	28.29		2.34123e+08
3-Butylidenephthalide		C12 H12 O2	0.23	29.633		2.19047e+08
Ginkgolic Acid C15:1		C22 H34 O3	-0.2	48.313		1.97533e+08
Arglabin	C15 H18 O3	-0.24	246.125	34.873		167397516
Nicotinic acid		C6 H5 N O2	0.51	2.888		3.54857e+08
Paeonol	C9 H10 O3	-0.05	166.063	17.777		3.84603e+08
Stachydrine		C7 H13 N O2	0.26	1.637		3922208519
Dihydrotanshinone I		C18 H14 O3	-0.07	36.759		3034918394
α-Linolenic acid		C18 H30 O2	-0.28	40.426		1784033478
Hispidulin		C16 H12 O6	-0.77	29.256		8.71491e+08
Cantharidin		C10 H12 O4	-0.52	23.258		6.8905e+08
Ferulaldehyde		C10 H10 O3	-0.23	20.918		6.19808e+08
Skimmin	C15 H16 O8	-1.56	324.084	21.763		6.09762e+08
Wilforlide A		C30 H46 O3	-0.37	32.337		5.90879e+08
Astragalin		C21 H20 O11	-0.66	18.606		5.13133e+08
Cinnamaldehyde		C9 H8 O	-0.6	23.259		1.62456e+08
Iridin	C24 H26 O13	0.42	522.138	23.175		1.20873e+08
Coptisine chloride				23.773		4.93078e+07
Curcumenol		C15 H22 O2	0.1	33.759		4.87084e+07
Curcumol	C15 H24 O2	0.06	236.178	36.005		4.84785e+07
Anisic aldehyde		C8 H8 O2	-0.1	21.684		4.72555e+07
Cinnamic acid		C9 H8 O2	-0.2	19.221		5.48327e+07
Senkyunolide A		C12 H16 O2	-0.12	33.987		4.24117e+07
3,5-Dimethoxy-4-hydroxybenzaldehyde		C9 H10 O4	-0.25	23.39		4.07001e+07
Sinensetin		C20 H20 O7	0.07	30.829		3.96462e+07
5-O-Demethylnobiletin		C20 H20 O8	-0.28	29.546		3.82847e+07
Coumarin		C9 H6 O2	-0.36	21.485		5.55401e+07
Quercetin		C15 H10 O7	-1.32	21.592		6.29235e+07
4-Methyl-6,7-dihydroxycoumarin		C10 H8 O4	-1.17	22.167		1.1543e+08
18 β-Glycyrrhetintic Acid		C30 H46 O4	38292.3	26.973		1.08662e+08
Decursinol		C14 H14 O4	-0.11	30.509		9.2678e+07
Germacrone		C15 H22 O	-0.05	34.026		7.94627e+07
Isoquercitrin		C21 H20 O12	0.07	19.092		7.52562e+07
α-Cyperone		C15 H22 O	82553.7	27.58		7.11605e+07
L-Phenylalanine		C9 H11 N O2	0.48	20.162		6.71357e+07
2-Hydroxy-4-methoxybenzaldehyde		C8 H8 O3	-0.66	21.538		6.70571e+07
Demethyleneberberine		C19 H17 N O4	-0.53	22.576		125950784
Cafestol	C20 H28 O3	-0.9	316.204	25.861		2.24417e+06
